# Supplementary material for: Physical gels of poly(vinylamine) by thermal curing
Source: Royal Society of Chemistry journal article supplement (doi:10.1039/d0ra01607a), 2020-01-01
Supplement: d0ra01607a1.pdf [file d0ra01607a1.pdf]

## Electronic Supporting Information

### Physical gels of poly(vinylamine) by thermal curing

Thorsten Fischer, Martin Möller, Smriti Singh

*<sup>a</sup>DWI-Leibniz-Institute for Interactive Materials, e.V., RWTH-Aachen University,  
Forckenbeckstraße 50, D-52074 Aachen, Germany*

## Table of Content

|                                                                                                                  |     |
|------------------------------------------------------------------------------------------------------------------|-----|
| 1. Fig. S1. The dissipation factor $\tan \delta$ for 5, 7, and 10 wt% of p(VAm-co-VAA) in dependence on the time | S3  |
| 2. Fig. S2. Concentration dependent $^1\text{H}$ NMR of the physical gel                                         | S4  |
| 3. Fig. S3. Concentration dependent $^1\text{H}$ NMR of PEG-PC                                                   | S5  |
| 4. Scheme S1. Scheme of the chemical gelation                                                                    | S6  |
| 5. Fig. S4. Proton NMR of the supernatant                                                                        | S7  |
| 6. Fig. S5. DLS Autocorrelation function of p(VAm-co-VAA) at 20 °C and 50 °C                                     | S7  |
| 7. Fig. S6. DLS Radius distribution function of p(VAm-co-VAA)                                                    | S8  |
| 8. Fig. S7. Schematic illustration of the homogenization process                                                 | S8  |
| 9. Fig. S8. DSC curve of p(VAm-co-VAA)                                                                           | S9  |
| 10. Fig. S9. DSC curve of PEG-PC                                                                                 | S9  |
| 11. Fig. S10. DSC curve of the supernatant                                                                       | S10 |
| 12. Fig. S11. DSC curve of the physical gel                                                                      | S10 |
| 13. Fig. S12 Proton NMR of the physical gel                                                                      | S11 |
| 14. Fig. S13. Frequency sweep after five heating/cooling cycles                                                  | S11 |
| 15. Fig. S14. Amplitude sweep of the physical gel                                                                | S12 |

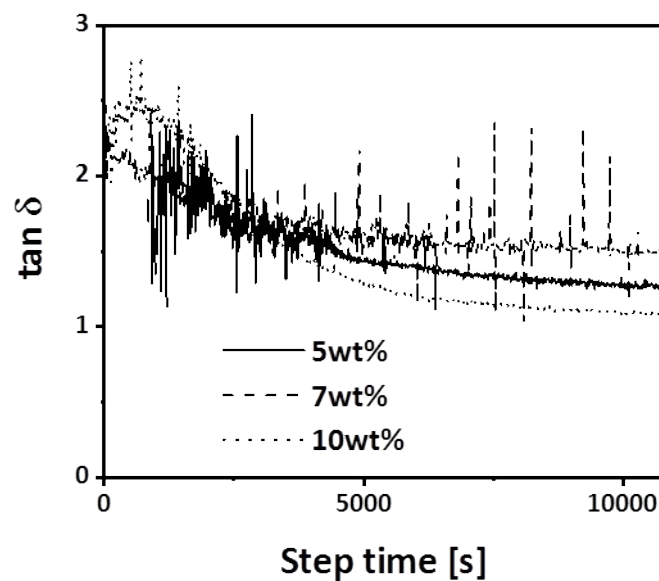

**Fig. S1.** The dissipation factor  $\tan \delta$  for 5, 7, and 10 wt% of p(VAm-co-VAA) in methanol in dependence on the time with a frequency of 1 Hz and an amplitude of 1 %. The lower the dissipation factor the more elastic is the response. At 10 wt% of p(VAm-co-VAA) the dissipation factor is close to 1, which indicates that the behavior is more solide-like than viscous.

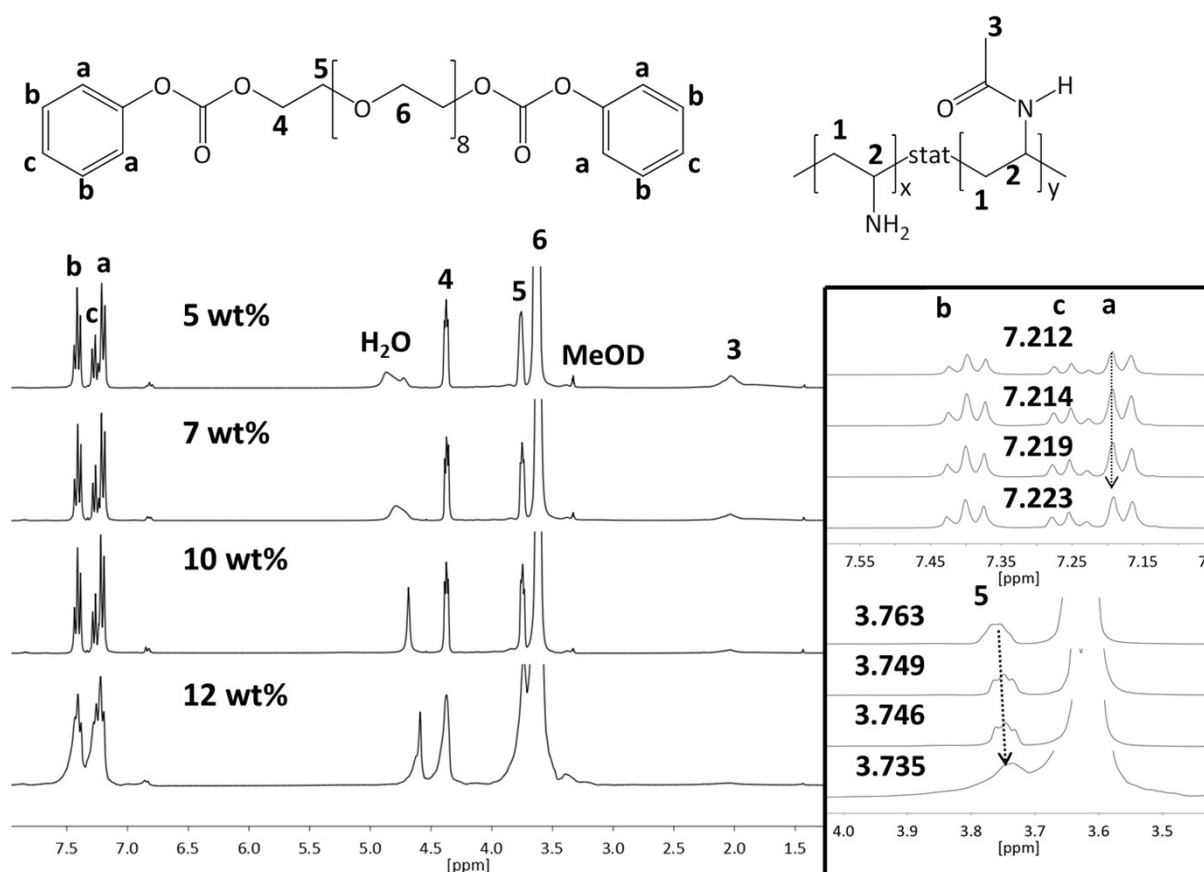

**Fig. S2.**  $^1\text{H}$  NMR of 5 wt%, 7 wt%, 10 wt%, and 12 wt% p(VAm-coVAA) with the respective PEG-PC amount (amine-to-carbonate ratio 1:1). With increasing concentrations the peaks are broadened. The insets show the downfield shift of peak 'a' with the respective chemical shift in ppm (top) and the upfield shift of peak 5 (bottom). Peak 1 and 2 are not visible because of their too low intensity.

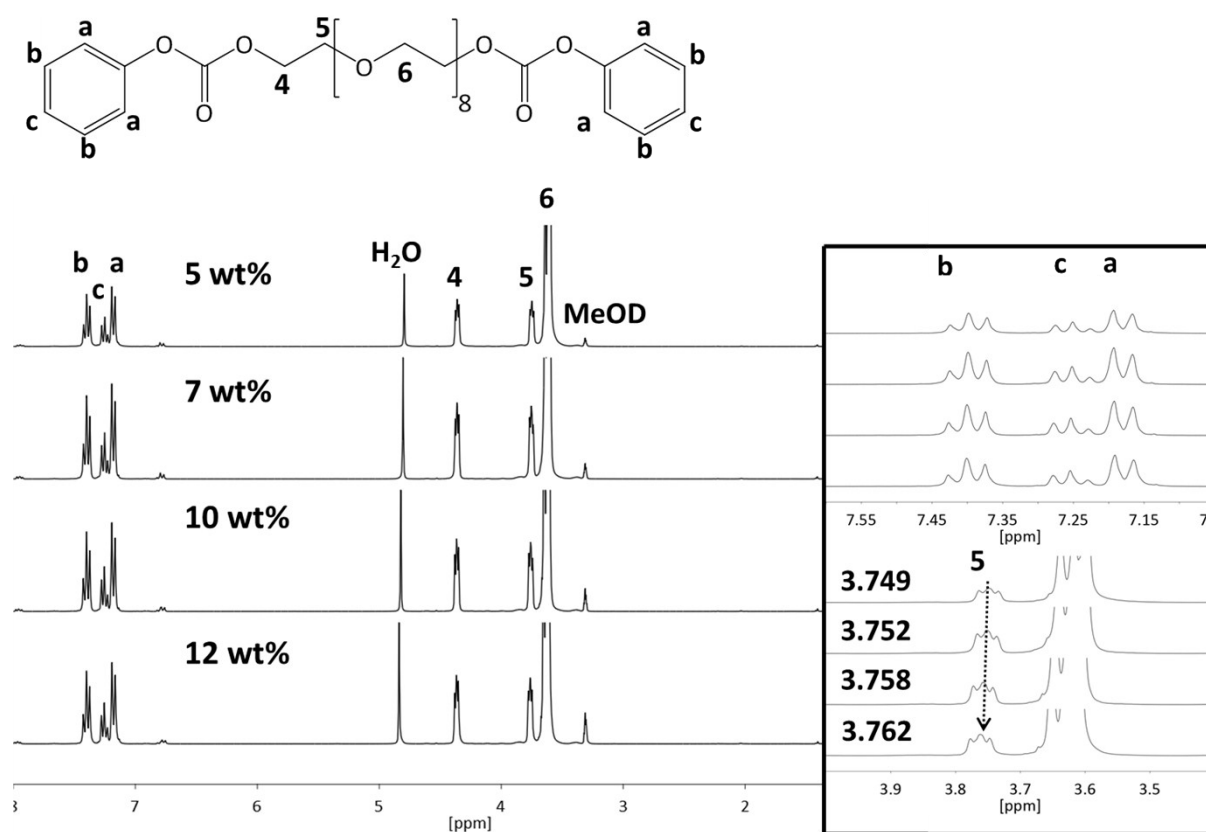

**Fig. S3.**  $^1\text{H}$  NMR of 5 wt%, 7 wt%, 10 wt%, and 12 wt% of only the respective PEG-PC. No peak broadening could be observed. The insets show that there is no shift for peak 'a' and, contrary to the physical gel, a downfield shift of peak 5.

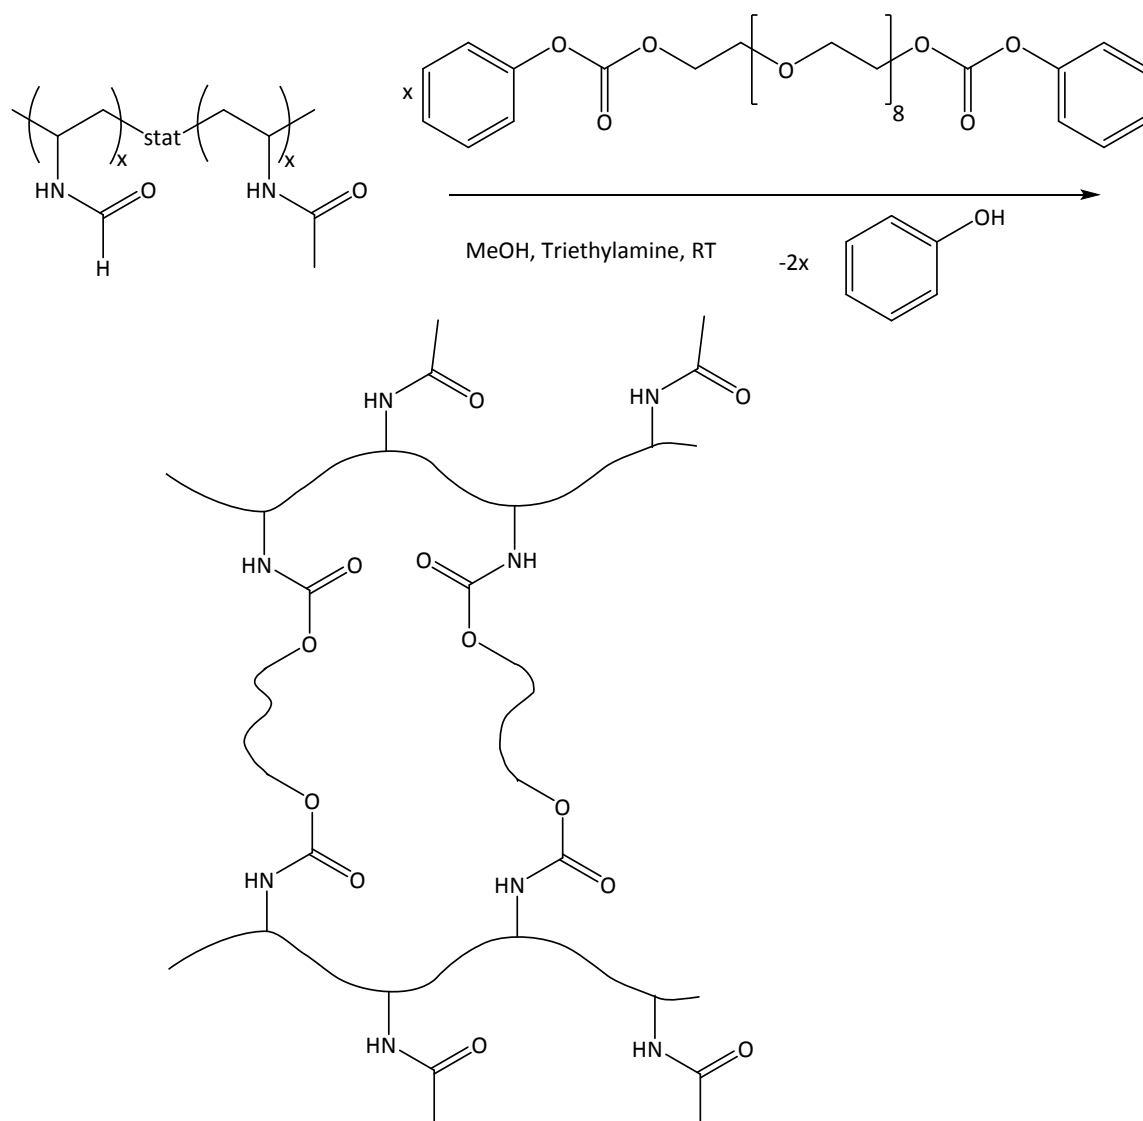

**Scheme S1.** A chemical crosslinking in presence of a base (triethylamine, TEA) would release phenol.

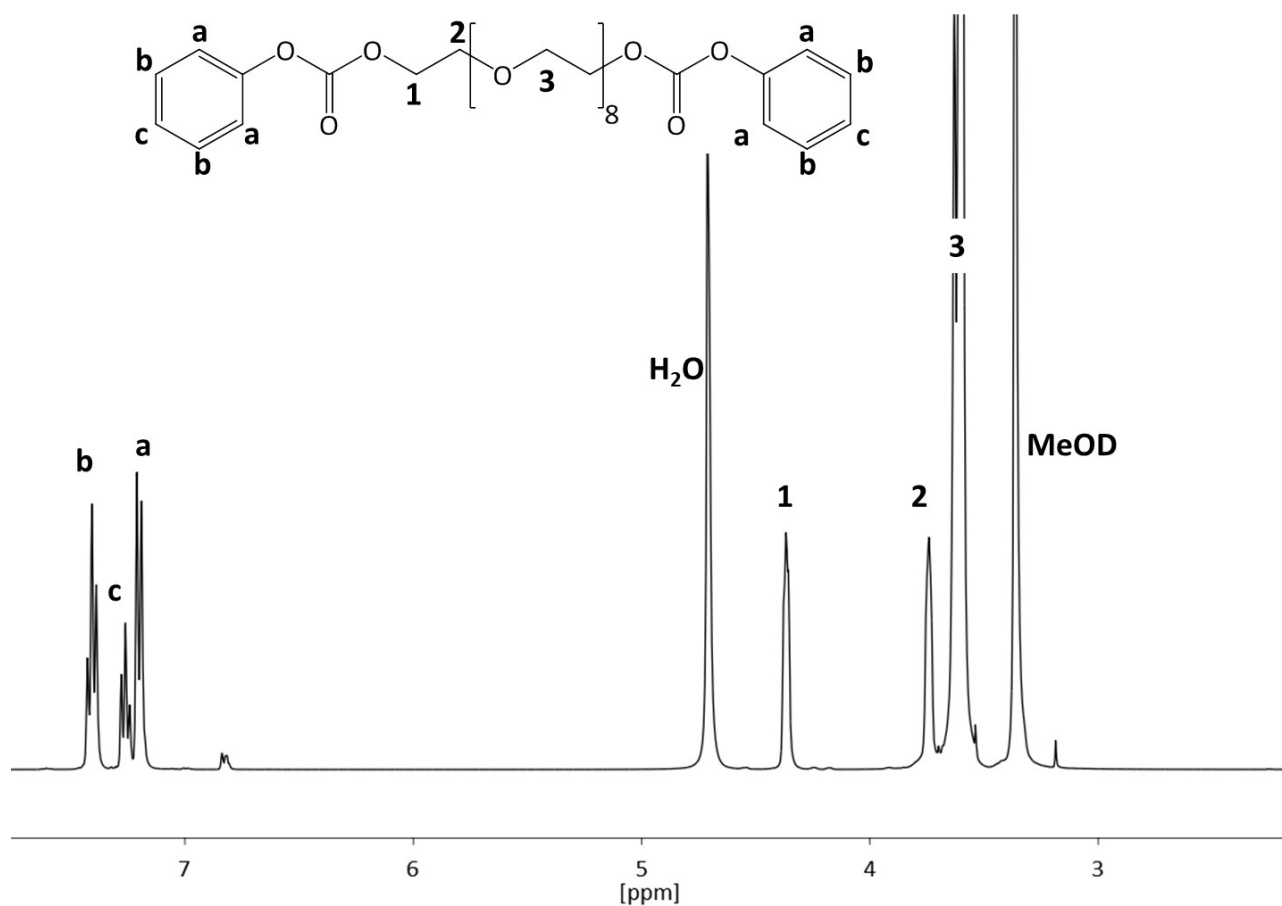

**Fig. S4.**  $^1\text{H}$  NMR of the supernatant. Only PEG-PC is visible.

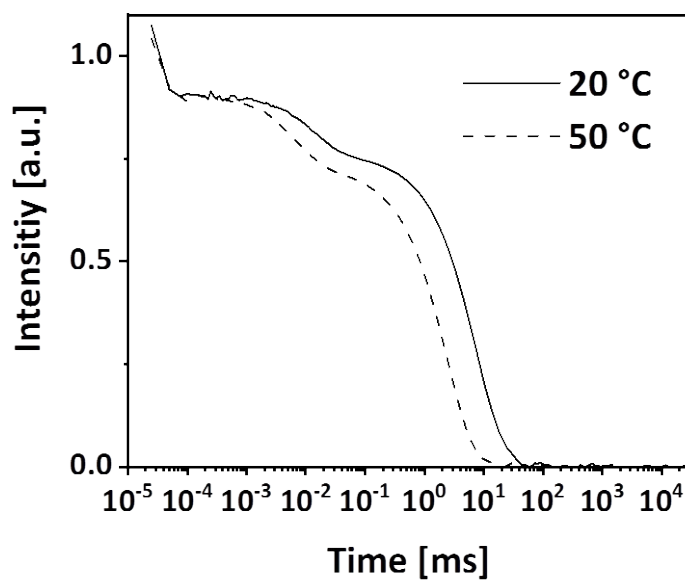

**Fig. S5.** Autocorrelation function of p(VAm-co-VAA) in methanol ( $10\text{ mg}\cdot\text{mL}^{-1}$ ) at  $20\text{ }^{\circ}\text{C}$  and  $50\text{ }^{\circ}\text{C}$ . In both cases there are a slow and a fast mode visible reflecting the aggregations and neat polymer, respectively. With increasing temperature the aggregates became smaller.

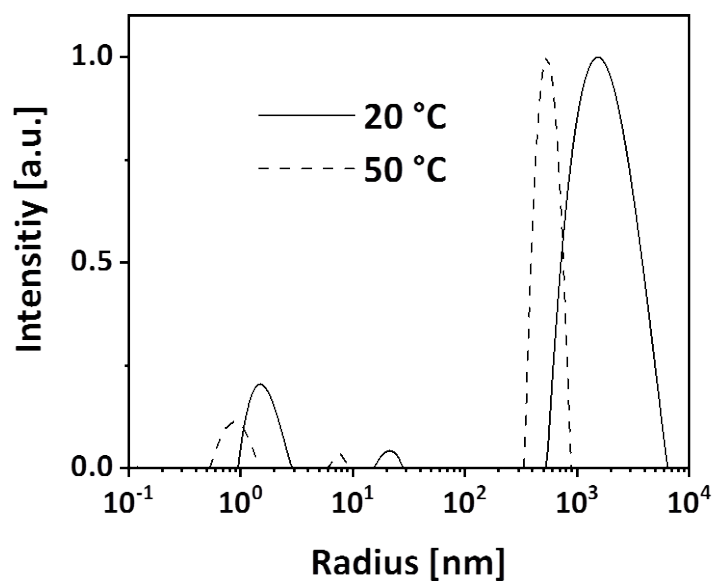

**Fig. S6.** Radius distribution function of p(VAm-co-VAA) in methanol ( $10 \text{ mg}\cdot\text{mL}^{-1}$ ) at  $20^\circ\text{C}$  and  $50^\circ\text{C}$  based on Fig. S6. At higher temperature the aggregates became smaller.

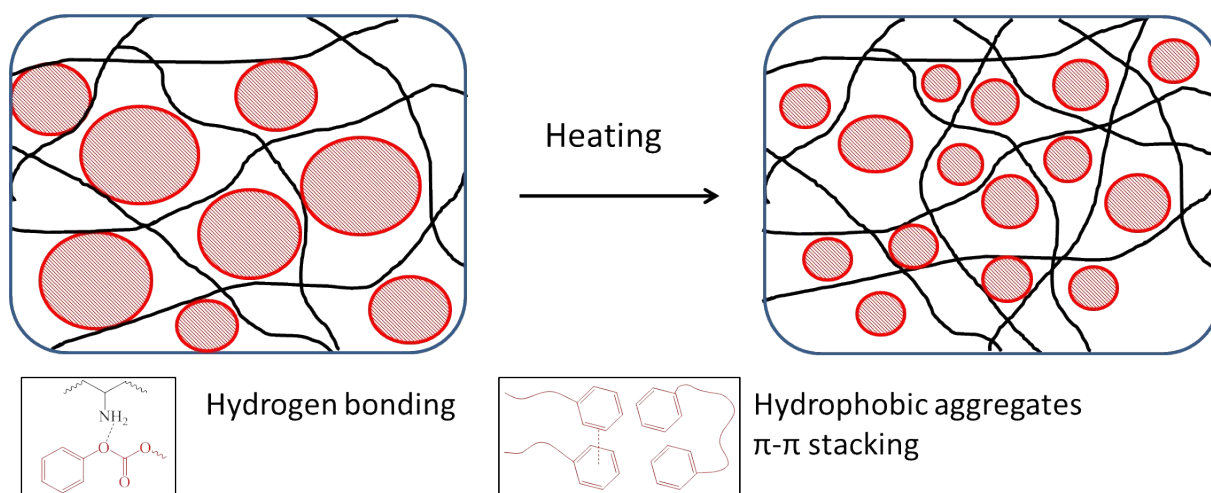

**Fig. S7.** Schematic illustration of the physical gel. The hydrophobic aggregates are stabilized by hydrogen bonding at the periphery and by  $\pi$ - $\pi$  stacking in the core. Upon heating the stabilizing effect of the hydrogen bonds is decreased and the physical gel becomes more homogeneous

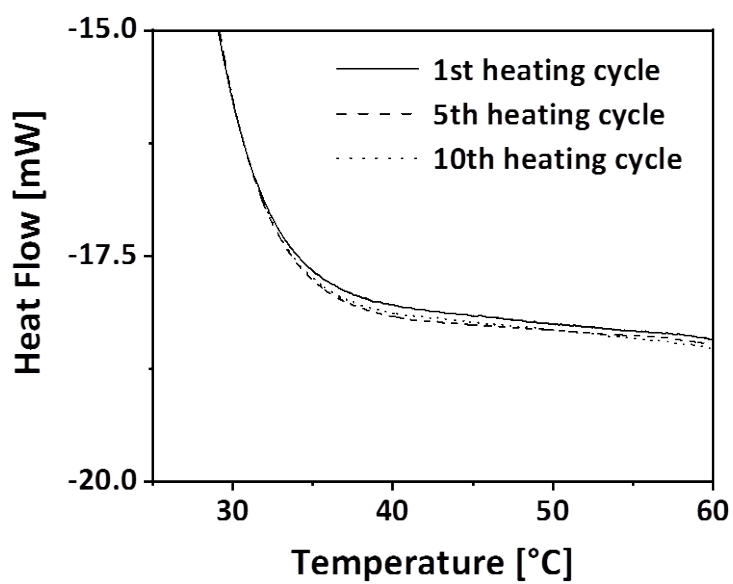

**Fig. S8.** DSC curve (endo up) of p(VAm-co-VAA) in methanol (10 wt%) with a heating rate of  $5\text{ }^{\circ}\text{C}\cdot\text{min}^{-1}$ . No signal is visible

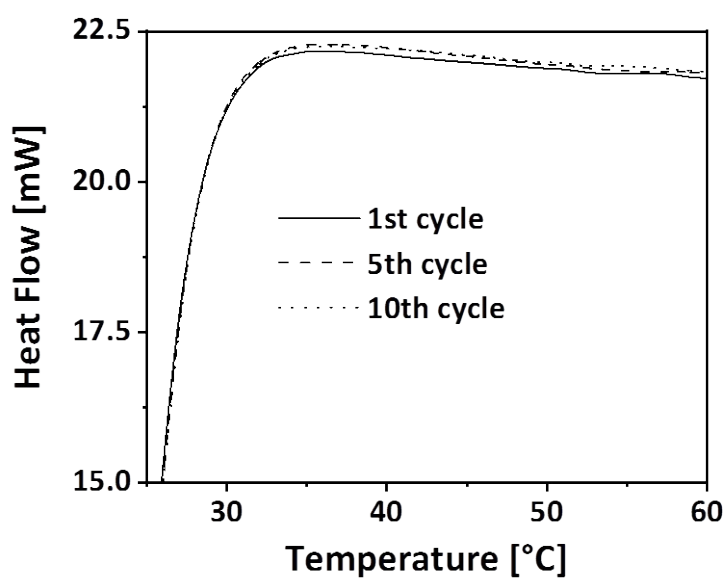

**Fig. S9.** DSC curve (endo up) of PEG-PC in methanol (34 wt%) with a heating rate of  $5\text{ }^{\circ}\text{C}\cdot\text{min}^{-1}$ . No signal is visible.

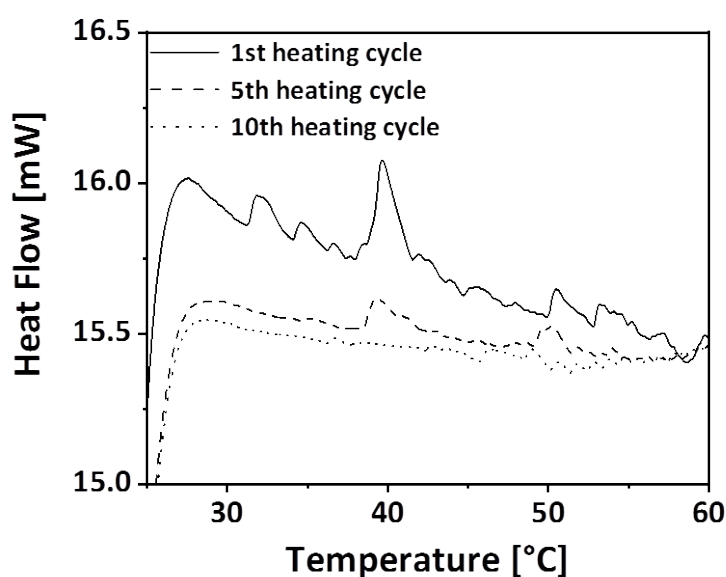

**Fig. S10.** DSC curve (endo up) of the supernatant of the physical gel with a heating rate of  $5\text{ }^{\circ}\text{C}\cdot\text{min}^{-1}$ . The prominent signal around  $40\text{ }^{\circ}\text{C}$  is caused by mixing/homogenization.

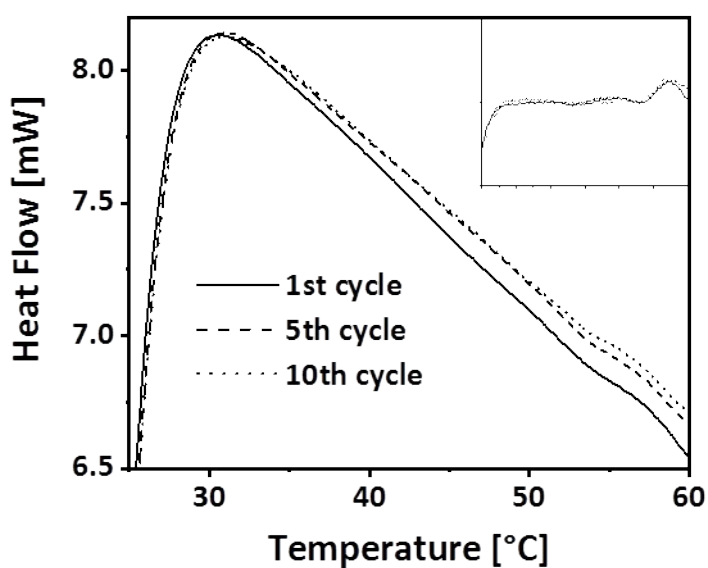

**Fig. S11.** DSC curve (endo up) for the physical gel with a heating rate of  $5\text{ }^{\circ}\text{C}\cdot\text{min}^{-1}$ . The inset shows the baseline corrected graph to make the signal around  $55\text{ }^{\circ}\text{C}$  more visible. The signal is caused by the mixing enthalpy and shifted towards higher temperature and weaker compared to the supernatant because the gel is more strongly bound.

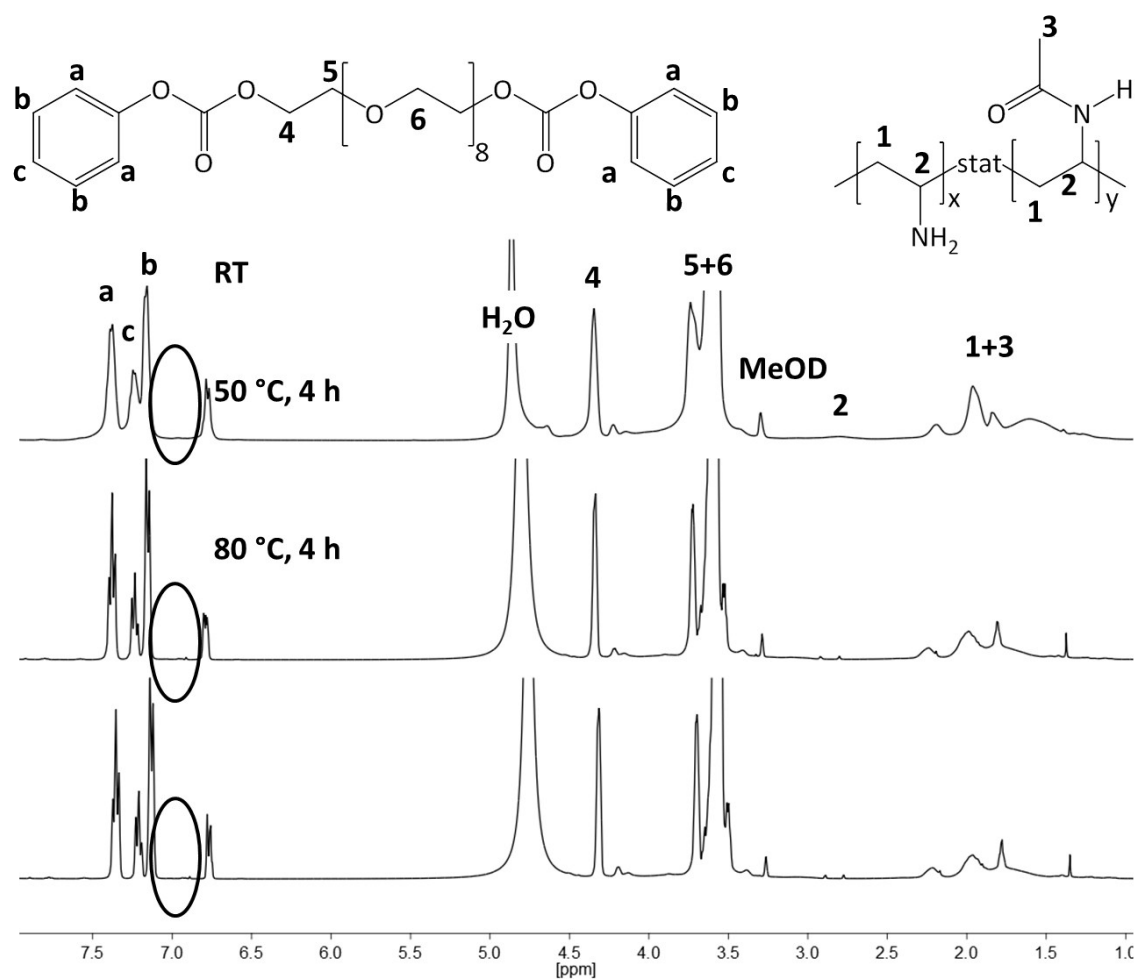

**Fig. S12.**  $^1\text{H}$  NMR of the physical gel. The circle indicates, where the shifts of any phenol would be. Since no phenol is found, there is no chemical reaction/crosslinking, so the physical gel is thermostable.

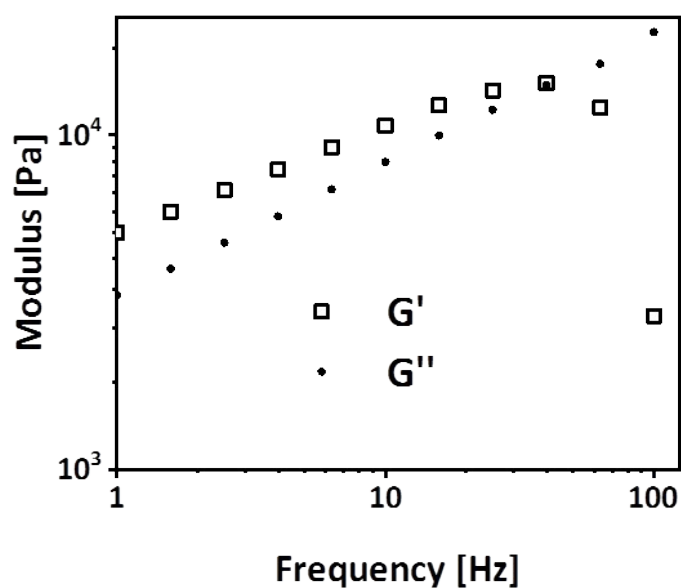

**Fig. S13.** Frequency sweep after five heating/cooling cycles in a range of 1 – 100 Hz with an amplitude of 1 %. The frequency dependence shows, that the gel is physically crosslinked.

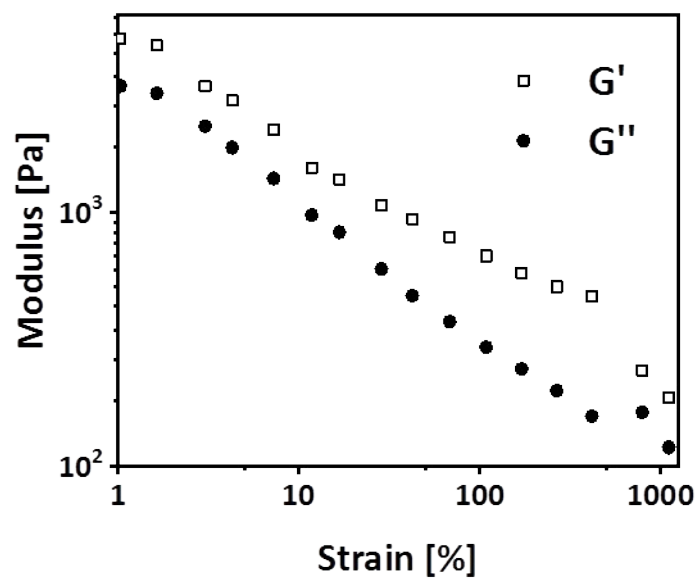

**Fig. S14.** Amplitude Sweep of the physical gel with a frequency of 1 Hz.
